# Supplementary material for: A Tutorial on Multilevel Survival Analysis: Methods, Models and Applications
Source: PubMed Central journal article supplement — Int Stat Rev. Author manuscript; Available in PMC 2018 Jan 5. (PMC5756088; doi:10.1111/insr.12214), 2017-03-24
Supplement: NIHMS6861-supplement-Supplementary_Information.pdf [file NIHMS6861-supplement-Supplementary_Information.pdf]

## Appendix A

### 1. Review of the Cox Proportional Hazards model for survival analysis

In this section we provide a brief review of the Cox proportional hazards model for the analysis of survival data. The use of this model is ubiquitous in many research fields. We introduce this model as it forms the basis for one of the methods for the analysis of multilevel survival data.

Let  $T$  denote the time of the occurrence of the event of interest. A key concept in survival analysis is that of the hazard function:  $h(t) = \lim_{\Delta t \rightarrow 0} \frac{\Pr(t \leq T < t + \Delta t \mid T \geq t)}{\Delta t}$ . The hazard function is a function of time that denotes the instantaneous rate of the occurrence of the event, conditional on the subject having survived to time  $t$ . The Cox proportional hazard regression model relates explanatory variables to the hazard function:  $h_i(t) = h_0(t) \exp(\alpha_1 X_{1i} + \dots + \alpha_p X_{pi})$ , where  $h_i(t)$  denotes the hazard function for the  $i$ th subject, while  $h_0(t)$  denotes the baseline hazard function (the hazard function for a subject whose covariates are all equal to zero). The model can also be formulated on the log-hazard scale:  $\log(h_i(t)) = \log(h_0(t)) + \alpha_1 X_{1i} + \dots + \alpha_p X_{pi}$ .

Regression coefficients from the Cox proportional hazards model are log-hazard ratios. When a regression coefficient is exponentiated, it denotes the relative change in the hazard of the occurrence of the event of interest that is associated with a one unit increase in the associated predictor variable.

The reader is referred elsewhere for comprehensive background information on these models (Therneau and Grambsch 2000; Lawless 1982; Kalbfleisch and Prentice 2002; Hosmer and Lemeshow 1999; Cox and Oakes 1984; Hosmer, Lemeshow and May 2008).

## 2. Choosing between frailty distributions

Therneau and Grambsch provide limited advice on choosing between the gamma and log-normal distributions for the shared frailty terms (Therneau and Grambsch 2000). They note that the former distribution is asymmetric on the log-hazard scale, while the latter is symmetric. In a particular application, Therneau and Grambsch noted that the estimated gamma distribution had a heavy lower tail, implying the existence of a proportion of clusters with exceptionally low risk. Based on the setting, this assumption may or not be appropriate. If it were inappropriate, the log-normal shared frailty model may be more appropriate. Several authors have described methods for assessing whether a frailty model in which the random effects follow a gamma distribution fit the data well. We briefly highlight different methods, referring the interested reader to the summary provided by Wienke (Wienke 2011). Shih and Louis describe a graphical method for assessing the appropriateness of the gamma distribution when used with a shared frailty model (Shih and Louis 1995). However, this test is of limited applicability, as it assumes that the baseline hazard function is parametric and is known. Glidden extended these methods to develop graphical and numerical methods for assessing the adequacy of the assumption that the shared frailty terms follow a gamma distribution (Glidden 1999). His method was based on the posterior expectation of the frailty given the observed data. Finally, Cui and Sun developed similar graphic and numerical methods for assessing the goodness-of-fit of the gamma frailty model (Cui and Sun 2004). However, a limitation of each of these methods is that they do not allow for the comparison between different distributions for the shared frailty terms, but only permit an assessment of whether the gamma distribution is reasonable. Therneau expressed a preference for the log-normal distribution for the random effects as this leads to a simpler framework for

multiple and correlated random effects (Therneau 2015). Chateau and Janssen suggest that further research in this area is required (Duchateau and Janssen 2008).

### **3. Variable names in case study**

In the software output that is provided, the following variable names are used for patient-level variables: age (patient age), female (patient sex: males are the reference category), arf (acute renal failure), carddys (cardiac dysrhythmia), chf (congestive heart failure), crf (chronic renal failure), cvd (cerebrovascular disease or stroke), diabcomp (diabetes mellitus with complications), malig (malignancy), pulmoned (pulmonary edema), shock (cardiogenic shock). The variable 'inst' (short for institution) is a variable denoting the identity of the hospital to which the patient was admitted. The hospital-level variables are as follows: instvolume (hospital AMI volume in year prior to study), teachinghosp (teaching vs. non-teaching hospital), hosprevasc (capacity for cardiac revascularization at the hospital), hospcath (capacity for cardiac angiography at the hospital). When fitting PWE mixed effects models or discrete time mixed effects models, 'interval' is a variable denoting the time interval to which the record in question refers. When fitting the PWE mixed effects models, 'logtime' is an offset variable denoting the logarithm of the exposure time during the given interval.

#### 4. Comparison of statistical software packages for analyzing multilevel survival data

| Software package | Advantages                                                                                                                                                                                                                                                                                                                                                                                                                                                                                                                                                                                                                                                                    | Disadvantages                                                                                                                                                                                                                                                                                                                                                                                                                       |
|------------------|-------------------------------------------------------------------------------------------------------------------------------------------------------------------------------------------------------------------------------------------------------------------------------------------------------------------------------------------------------------------------------------------------------------------------------------------------------------------------------------------------------------------------------------------------------------------------------------------------------------------------------------------------------------------------------|-------------------------------------------------------------------------------------------------------------------------------------------------------------------------------------------------------------------------------------------------------------------------------------------------------------------------------------------------------------------------------------------------------------------------------------|
| R                | <ul style="list-style-type: none"> <li>• Cox-mixed effects model can incorporate random coefficients (using the <code>coxme</code> and <code>frailtypack</code> packages).</li> <li>• Cox-mixed effects model can incorporate multiple random effects, allowing for the analysis of multilevel data with more than two levels (using the <code>coxme</code> and <code>frailtypack</code> packages)</li> <li>• Cox-frailty model fit using <code>coxph</code> function in <code>survival</code> package allows two different distributions for the shared frailty terms (gamma and log-normal distributions).</li> <li>• The <code>survSplit</code> function in the</li> </ul> | <ul style="list-style-type: none"> <li>• <code>glmer</code> function in <code>lme4</code> package for estimating the PWE and discrete time survival model is restricted to one estimation method (adaptive Gauss-Hermite quadrature). However, it does permit specification of the number of quadrature points (the use of one quadrature point is equivalent to using the Laplace approximation to the log-likelihood).</li> </ul> |

|       |                                                                                                                                                                                                                                                                                                                                                                     |                                                                                                                                                                                                                                                                                                                                          |
|-------|---------------------------------------------------------------------------------------------------------------------------------------------------------------------------------------------------------------------------------------------------------------------------------------------------------------------------------------------------------------------|------------------------------------------------------------------------------------------------------------------------------------------------------------------------------------------------------------------------------------------------------------------------------------------------------------------------------------------|
|       | <p>survival package can be used in the construction of the datasets for the PWE and discrete time survival models.</p>                                                                                                                                                                                                                                              |                                                                                                                                                                                                                                                                                                                                          |
| SAS   | <ul style="list-style-type: none"> <li>• Cox-frailty model fit using PHREG procedure allows two different distributions for the shared frailty terms (gamma and log-normal).</li> <li>• Proc GLIMMIX, used for fitting the PWE model with mixed effects and discrete time model with mixed effects, has a large number of estimation method implemented.</li> </ul> | <ul style="list-style-type: none"> <li>• Requires using programming steps to create datasets for the PWE and discrete time survival models.</li> <li>• Cox model with mixed effects cannot incorporate random coefficients.</li> <li>• Cox model with mixed effects cannot analyze multilevel data with more than two levels.</li> </ul> |
| Stata | <ul style="list-style-type: none"> <li>• The <code>stsplit</code> function can be used in the construction of the datasets for the</li> </ul>                                                                                                                                                                                                                       | <ul style="list-style-type: none"> <li>• Cox-frailty model fit only allows one distribution for the shared</li> </ul>                                                                                                                                                                                                                    |

|  |                                                                                                                                                                                                                                                                                                                                                                                         |                                                                                                                                                                                                                                                                    |
|--|-----------------------------------------------------------------------------------------------------------------------------------------------------------------------------------------------------------------------------------------------------------------------------------------------------------------------------------------------------------------------------------------|--------------------------------------------------------------------------------------------------------------------------------------------------------------------------------------------------------------------------------------------------------------------|
|  | <p>PWE and discrete time survival models.</p> <ul style="list-style-type: none"><li>• The mepoisson function for fitting the PWE survival model with mixed effects has a large number of estimation method implemented.</li><li>• The mecloglog function for fitting the discrete time survival model with mixed effects has a large number of estimation method implemented.</li></ul> | <p>frailty terms (gamma distribution).</p> <ul style="list-style-type: none"><li>• Cox model with mixed effects cannot incorporate random coefficients.</li><li>• Cox model with mixed effects cannot analyze multilevel data with more than two levels.</li></ul> |
|--|-----------------------------------------------------------------------------------------------------------------------------------------------------------------------------------------------------------------------------------------------------------------------------------------------------------------------------------------------------------------------------------------|--------------------------------------------------------------------------------------------------------------------------------------------------------------------------------------------------------------------------------------------------------------------|

## **Appendix B.** Statistical software code for fitting two-level multilevel survival models.

### **Statistical software code 1:** SAS code for frailty survival model (log-normal frailty distribution)

```
proc phreg data=cohort;
  class inst;
  model time*event(0) = age female arf carddys chf crf
    cvd diabcomp malig pulmoned shock instvolume teachinghosp
    hosprevasc hospcath /ties=efron;
  random inst /dist=lognormal;
run;
```

### **Statistical software code 2:** SAS code for frailty survival model (Gamma distribution)

```
proc phreg data=cohort;
  class inst;
  model time*event(0) = age female arf carddys chf crf
    cvd diabcomp malig pulmoned shock instvolume teachinghosp
    hosprevasc hospcath /ties=efron;
  random inst /dist=gamma;
run;
```

### **Statistical software code 3:** R code for frailty survival model (log-normal frailty distribution)

```
Model.frailty.gaussian <- coxph(Surv(time,event) ~ age + female + arf +
  carddys + chf + crf + cvd + diabcomp + malig + pulmoned + shock +
  instvolume + teachinghosp + hosprevasc + hospcath +
  frailty(inst,distribution="gaussian"), data=omid)
```

### **Statistical software code 4:** R code for frailty survival model (Gamma distribution)

```
Model.frailty.gamma <- coxph(Surv(time,event) ~ age + female + arf +
  carddys + chf + crf + cvd + diabcomp + malig + pulmoned + shock +
  instvolume + teachinghosp + hosprevasc + hospcath +
  frailty(inst,distribution="gamma"), data=omid)
```

### **Statistical software code 5:** Stata code for frailty survival model (Gamma distribution)

```
stset time, failure(event)
# Declares data to be survival data

stcox age female arf carddys chf crf cvd diabcomp malig pulmoned shock
instvolume teachinghosp hosprevasc hospcath, efron shared(inst)
```

### **Statistical software code 6:** SAS code for PWE survival model with mixed effects

```
proc glimmix data=omid2 method=quad(qpoints=7);
  class inst interval;
  model event = age female arf carddys chf crf cvd
    diabcomp malig pulmoned shock instvolume teachinghosp
    hosprevasc hospcath interval /dist=poisson offset=logtime
  solution;
```

```
random intercept /subject = inst;
run;
```

**Statistical software code 7: R code for PWE survival model with mixed effects**

```
glmer(event ~ age + female + arf + carddys + chf + crf + cvd +
  diabcomp + malig + pulmoned + shock + instvolume + teachinghosp +
  hosprevasc + hospcath + interval + (1|inst),family=poisson,
  offset=logtime,nAGQ=7,data=omid2)
```

**Statistical software code 8: Stata code for PWE survival model with mixed effects**

```
mepoisson event age female arf carddys chf crf cvd diabcomp malig
pulmoned shock instvolume teachinghosp hosprevasc hospcath i.interval,
intmethod(mcaghermite) intpoints(7) offset(logtime) || inst:
```

**Statistical software code 9: SAS code for discrete time survival model with mixed effects**

```
proc glimmix data=cohort2 method=quad(qpoints=7);
  class inst interval;
  model event = age female arf carddys chf crf cvd
    diabcomp malig pulmoned shock instvolume teachinghosp
    hosprevasc hospcath interval /dist=binomial link=cloglog
    solution;
  random intercept /subject = inst;
run;
```

**Statistical software code 10: R code for discrete time survival model with mixed effects**

```
glmer(event ~ age + female + arf + carddys + chf + crf + cvd +
  diabcomp + malig + pulmoned + shock + instvolume + teachinghosp +
  hosprevasc + hospcath + interval +
  1|inst),family=binomial(link="cloglog"),nAGQ=7,data=omid2)
```

**Statistical software code 11: Stata code for discrete time survival model with mixed effects**

```
mecloglog event age female arf carddys chf crf cvd diabcomp malig
pulmoned shock instvolume teachinghosp hosprevasc hospcath i.interval,
intmethod(mcaghermite) intpoints(7) || inst:
```

**Statistical software code 12: SAS code for discrete time survival model with random coefficients (effect of shock varies across hospitals)**

```
proc glimmix data=cohort2 method=quad(qpoints=7);
  class inst interval;
  model event = age female arf carddys chf crf cvd
    diabcomp malig pulmoned shock instvolume teachinghosp
    hosprevasc hospcath interval /dist=binomial link=cloglog solution;
  random intercept shock /subject = inst;
run;
```



**Statistical software code 13:** R code for Cox model with random coefficients (effect of shock varies across hospitals)

```
coxme(Surv(time,event) ~ age + female + arf + carddys + chf + crf +
  cvd + diabcomp + malig + pulmoned + shock + instvolume +
  teachinghosp + hosprevasc + hospcath + (1 + shock|inst),
  ties="efron", data=omid)
```

**Statistical software code 14:** SAS code for log-normal frailty survival model with cross-level interactions

```
proc phreg data=cohort;
  class inst;
  model time*event(0) = age female arf carddys chf crf
    cvd diabcomp malig pulmoned shock instvolume teachinghosp
    hosprevasc hospcath shock*hosprevasc shock*hospcath f/ties=efron;
  random inst /dist=lognormal;
run;
```

**Statistical software code 15:** SAS code for discrete time survival model with mixed effects and with cross-level interactions

```
proc glimmix data=cohort2 method=quad(qpoints=7);
  class inst interval;
  model event = age female arf carddys chf crf cvd
    diabcomp malig pulmoned shock instvolume teachinghosp
    hosprevasc hospcath shock*hosprevasc shock*hospcath interval
    /dist=binomial link=cloglog solution;
  random intercept /subject = inst;
run;
```

**Appendix C. Two-level multilevel survival models: Output of select statistical analyses.**

**Statistical software output C1: SAS output for frailty survival model (gamma distribution)**

Covariance Parameter Estimates

| Cov<br>Parm | Estimate |
|-------------|----------|
| inst        | 0.02443  |

Analysis of Maximum Likelihood Estimates

| Parameter    | DF | Parameter<br>Estimate | Standard<br>Error | Chi-Square | Pr > ChiSq |
|--------------|----|-----------------------|-------------------|------------|------------|
| age          | 1  | 0.06105               | 0.00223           | 751.7272   | <.0001     |
| female       | 1  | 0.10177               | 0.04537           | 5.0323     | 0.0249     |
| arf          | 1  | 0.45370               | 0.06935           | 42.8057    | <.0001     |
| carddys      | 1  | 0.11369               | 0.05526           | 4.2328     | 0.0396     |
| chf          | 1  | 0.22287               | 0.04817           | 21.4093    | <.0001     |
| crf          | 1  | 0.22583               | 0.07056           | 10.2428    | 0.0014     |
| cvd          | 1  | 0.36860               | 0.10433           | 12.4831    | 0.0004     |
| diabcomp     | 1  | 0.24469               | 0.08794           | 7.7425     | 0.0054     |
| malig        | 1  | 0.91116               | 0.08811           | 106.9296   | <.0001     |
| pulmoned     | 1  | 0.15493               | 0.18017           | 0.7395     | 0.3898     |
| shock        | 1  | 2.09449               | 0.08149           | 660.6722   | <.0001     |
| instvolume   | 1  | -0.0006060            | 0.0002580         | 5.5189     | 0.0188     |
| teachinghosp | 1  | -0.16025              | 0.08820           | 3.3012     | 0.0692     |
| hosprevasc   | 1  | 0.12690               | 0.08440           | 2.2610     | 0.1327     |
| hospcath     | 1  | -0.18301              | 0.15061           | 1.4764     | 0.2243     |

**Statistical software output C2: R output for frailty survival model (log-normal frailty distribution)**

|                           | coef      | se(coef) | se2      | Chisq  | DF   | p       |
|---------------------------|-----------|----------|----------|--------|------|---------|
| age                       | 0.061068  | 0.002228 | 0.002222 | 751.27 | 1.0  | 0.0e+00 |
| female                    | 0.101635  | 0.045387 | 0.045282 | 5.01   | 1.0  | 2.5e-02 |
| arf                       | 0.453468  | 0.069418 | 0.069057 | 42.67  | 1.0  | 6.5e-11 |
| carddys                   | 0.114358  | 0.055286 | 0.055127 | 4.28   | 1.0  | 3.9e-02 |
| chf                       | 0.223574  | 0.048193 | 0.048052 | 21.52  | 1.0  | 3.5e-06 |
| crf                       | 0.226253  | 0.070611 | 0.070368 | 10.27  | 1.0  | 1.4e-03 |
| cvd                       | 0.368083  | 0.104421 | 0.104059 | 12.43  | 1.0  | 4.2e-04 |
| diabcomp                  | 0.245576  | 0.088015 | 0.087644 | 7.79   | 1.0  | 5.3e-03 |
| malig                     | 0.912190  | 0.088164 | 0.087892 | 107.05 | 1.0  | 0.0e+00 |
| pulmoned                  | 0.152244  | 0.180309 | 0.179722 | 0.71   | 1.0  | 4.0e-01 |
| shock                     | 2.092748  | 0.081617 | 0.080954 | 657.46 | 1.0  | 0.0e+00 |
| instvolume                | -0.000635 | 0.000264 | 0.000213 | 5.77   | 1.0  | 1.6e-02 |
| teachinghosp              | -0.163355 | 0.092080 | 0.067756 | 3.15   | 1.0  | 7.6e-02 |
| hosprevasc                | 0.125466  | 0.087971 | 0.061652 | 2.03   | 1.0  | 1.5e-01 |
| hospcath                  | -0.177201 | 0.157116 | 0.115715 | 1.27   | 1.0  | 2.6e-01 |
| frailty(inst, distributio |           |          |          | 53.26  | 34.2 | 2.0e-02 |

Iterations: 9 outer, 42 Newton-Raphson  
Variance of random effect= 0.0295

### Statistical software output C3: R output for frailty survival model (Gamma distribution)

|                           | coef      | se(coef) | se2     | Chisq  | DF   | p       |
|---------------------------|-----------|----------|---------|--------|------|---------|
| age                       | 0.061050  | 0.002227 | 0.00222 | 751.70 | 1.0  | 0.0e+00 |
| female                    | 0.101772  | 0.045370 | 0.04527 | 5.03   | 1.0  | 2.5e-02 |
| arf                       | 0.453702  | 0.069351 | 0.06900 | 42.80  | 1.0  | 6.1e-11 |
| carddys                   | 0.113699  | 0.055260 | 0.05511 | 4.23   | 1.0  | 4.0e-02 |
| chf                       | 0.222883  | 0.048169 | 0.04804 | 21.41  | 1.0  | 3.7e-06 |
| crf                       | 0.225835  | 0.070564 | 0.07033 | 10.24  | 1.0  | 1.4e-03 |
| cvd                       | 0.368589  | 0.104331 | 0.10398 | 12.48  | 1.0  | 4.1e-04 |
| diabcomp                  | 0.244699  | 0.087942 | 0.08758 | 7.74   | 1.0  | 5.4e-03 |
| malig                     | 0.911175  | 0.088117 | 0.08786 | 106.93 | 1.0  | 0.0e+00 |
| pulmoned                  | 0.154896  | 0.180172 | 0.17962 | 0.74   | 1.0  | 3.9e-01 |
| shock                     | 2.094482  | 0.081495 | 0.08086 | 660.53 | 1.0  | 0.0e+00 |
| instvolume                | -0.000606 | 0.000256 | 0.00021 | 5.63   | 1.0  | 1.8e-02 |
| teachinghosp              | -0.160310 | 0.088516 | 0.06726 | 3.28   | 1.0  | 7.0e-02 |
| hosprevasc                | 0.126950  | 0.084779 | 0.06177 | 2.24   | 1.0  | 1.3e-01 |
| hospcath                  | -0.182991 | 0.150976 | 0.11587 | 1.47   | 1.0  | 2.3e-01 |
| frailty(inst, distributio |           |          |         | 47.53  | 30.5 | 2.5e-02 |

Iterations: 8 outer, 43 Newton-Raphson

Variance of random effect= 0.0245 I-likelihood = -19370.5

**Statistical software output C4: Stata output for frailty survival model (Gamma distribution)**

| _t           | Haz. Ratio | Std. Err. | z     | P> z  | [95% Conf. Interval] |          |
|--------------|------------|-----------|-------|-------|----------------------|----------|
| age          | 1.064749   | .002585   | 25.84 | 0.000 | 1.059695             | 1.069828 |
| female       | 1.071057   | .0523427  | 1.40  | 0.160 | .9732274             | 1.178721 |
| arf          | 1.717356   | .1250196  | 7.43  | 0.000 | 1.489                | 1.980732 |
| carddys      | 1.133844   | .0669874  | 2.13  | 0.033 | 1.009867             | 1.27304  |
| chf          | 1.404549   | .0719032  | 6.64  | 0.000 | 1.270461             | 1.55279  |
| crf          | 1.252364   | .0939461  | 3.00  | 0.003 | 1.081129             | 1.450719 |
| cvd          | 1.367561   | .157352   | 2.72  | 0.007 | 1.091459             | 1.713509 |
| diabcomp     | 1.330236   | .1228782  | 3.09  | 0.002 | 1.109943             | 1.594252 |
| malig        | 2.497872   | .2357743  | 9.70  | 0.000 | 2.07599              | 3.005489 |
| pulmoned     | 1.140032   | .2274025  | 0.66  | 0.511 | .7711302             | 1.685414 |
| shock        | 6.0303     | .6095204  | 17.78 | 0.000 | 4.946553             | 7.351488 |
| instvolume   | .9994406   | .000274   | -2.04 | 0.041 | .9989037             | .9999777 |
| teachinghosp | .8506432   | .0789609  | -1.74 | 0.081 | .7091444             | 1.020376 |
| hosprevasc   | 1.105139   | .098285   | 1.12  | 0.261 | .9283587             | 1.315583 |
| hospcath     | .8281011   | .1314021  | -1.19 | 0.235 | .6067583             | 1.130189 |
| theta        | .0254732   | .0122412  |       |       |                      |          |

## Statistical software output C5: R output for PWE survival model with mixed effects

Random effects:

```
Groups Name          Variance Std.Dev.
inst (Intercept) 0.02563 0.1601
Number of obs: 79653, groups: inst, 164
```

Fixed effects:

|             | Estimate   | Std. Error | z value | Pr(> z ) |     |
|-------------|------------|------------|---------|----------|-----|
| (Intercept) | -4.6872737 | 0.0607007  | -77.22  | < 2e-16  | *** |
| age         | 0.0613924  | 0.0022291  | 27.54   | < 2e-16  | *** |
| female      | 0.1013090  | 0.0453745  | 2.23    | 0.025567 | *   |
| arf         | 0.4582970  | 0.0694099  | 6.60    | 4.04e-11 | *** |
| carddys     | 0.1130633  | 0.0552998  | 2.04    | 0.040899 | *   |
| chf         | 0.2226240  | 0.0482294  | 4.62    | 3.91e-06 | *** |
| crf         | 0.2234466  | 0.0706464  | 3.16    | 0.001562 | **  |
| cvd         | 0.3688316  | 0.1043588  | 3.53    | 0.000409 | *** |
| diabcomp    | 0.2459027  | 0.0880226  | 2.79    | 0.005212 | **  |
| malig       | 0.9179610  | 0.0881876  | 10.41   | < 2e-16  | *** |
| pulmoned    | 0.1514139  | 0.1803052  | 0.84    | 0.401040 |     |
| shock       | 2.1181020  | 0.0815805  | 25.96   | < 2e-16  | *** |
| instvolume  | -0.0006135 | 0.0002657  | -2.31   | 0.020948 | *   |
| teachingosp | -0.1599794 | 0.0896200  | -1.79   | 0.074248 | .   |
| hosprevasc  | 0.1236705  | 0.0850027  | 1.45    | 0.145697 |     |
| hospcath    | -0.1798377 | 0.1522721  | -1.18   | 0.237591 |     |
| interval2   | -0.4812075 | 0.0591985  | -8.13   | 4.34e-16 | *** |
| interval3   | -1.1440495 | 0.0630744  | -18.14  | < 2e-16  | *** |
| interval4   | -2.0116903 | 0.0677953  | -29.67  | < 2e-16  | *** |
| interval5   | -2.5240312 | 0.0823414  | -30.65  | < 2e-16  | *** |

---

Signif. codes: 0 '\*\*\*' 0.001 '\*\*' 0.01 '\*' 0.05 '.' 0.1 ' ' 1

**Statistical software output C6: SAS output for PWE survival model with mixed effects**

Covariance Parameter Estimates

| Cov Parm  | Subject | Estimate | Standard Error |
|-----------|---------|----------|----------------|
| Intercept | inst    | 0.02578  | 0.01187        |

Solutions for Fixed Effects

| Effect       | interval | Estimate | Standard Error | DF    | t Value | Pr >  t |
|--------------|----------|----------|----------------|-------|---------|---------|
| Intercept    |          | -7.1881  | 0.08321        | 159   | -86.39  | <.0001  |
| age          |          | 0.06148  | 0.002230       | 79474 | 27.58   | <.0001  |
| female       |          | 0.09703  | 0.04537        | 79474 | 2.14    | 0.0325  |
| arf          |          | 0.4556   | 0.06942        | 79474 | 6.56    | <.0001  |
| carddys      |          | 0.1140   | 0.05528        | 79474 | 2.06    | 0.0392  |
| chf          |          | 0.2218   | 0.04823        | 79474 | 4.60    | <.0001  |
| crf          |          | 0.2253   | 0.07057        | 79474 | 3.19    | 0.0014  |
| cvd          |          | 0.3678   | 0.1044         | 79474 | 3.52    | 0.0004  |
| diabcomp     |          | 0.2516   | 0.08784        | 79474 | 2.86    | 0.0042  |
| malig        |          | 0.9275   | 0.08785        | 79474 | 10.56   | <.0001  |
| pulmoned     |          | 0.1586   | 0.1796         | 79474 | 0.88    | 0.3772  |
| shock        |          | 2.1229   | 0.08141        | 79474 | 26.08   | <.0001  |
| instvolume   |          | -0.00061 | 0.000266       | 79474 | -2.30   | 0.0213  |
| teachinghosp |          | -0.1654  | 0.08989        | 79474 | -1.84   | 0.0658  |
| hosprevasc   |          | 0.1346   | 0.08531        | 79474 | 1.58    | 0.1147  |
| hospcath     |          | -0.1896  | 0.1526         | 79474 | -1.24   | 0.2142  |
| interval     | 1        | 2.5008   | 0.08159        | 79474 | 30.65   | <.0001  |
| interval     | 2        | 2.0143   | 0.08336        | 79474 | 24.16   | <.0001  |
| interval     | 3        | 1.3525   | 0.08607        | 79474 | 15.72   | <.0001  |
| interval     | 4        | 0.4848   | 0.08954        | 79474 | 5.41    | <.0001  |
| interval     | 5        | 0        | .              | .     | .       | .       |

**Statistical software output C7: SAS output for discrete time survival model with mixed effects**

Covariance Parameter Estimates

| Cov Parm  | Subject | Estimate | Standard Error |
|-----------|---------|----------|----------------|
| Intercept | inst    | 0.02258  | 0.01099        |

Solutions for Fixed Effects

| Effect       | interval | Estimate | Standard Error | DF    | t Value | Pr >  t |
|--------------|----------|----------|----------------|-------|---------|---------|
| Intercept    |          | -4.8779  | 0.08300        | 159   | -58.77  | <.0001  |
| age          |          | 0.06065  | 0.002218       | 79474 | 27.35   | <.0001  |
| female       |          | 0.09751  | 0.04530        | 79474 | 2.15    | 0.0314  |
| arf          |          | 0.4575   | 0.06944        | 79474 | 6.59    | <.0001  |
| carddys      |          | 0.1042   | 0.05536        | 79474 | 1.88    | 0.0597  |
| chf          |          | 0.2203   | 0.04817        | 79474 | 4.57    | <.0001  |
| crf          |          | 0.2207   | 0.07077        | 79474 | 3.12    | 0.0018  |
| cvd          |          | 0.3684   | 0.1042         | 79474 | 3.54    | 0.0004  |
| diabcomp     |          | 0.2343   | 0.08830        | 79474 | 2.65    | 0.0080  |
| malig        |          | 0.9020   | 0.08839        | 79474 | 10.20   | <.0001  |
| pulmoned     |          | 0.1736   | 0.1787         | 79474 | 0.97    | 0.3312  |
| shock        |          | 2.0700   | 0.08177        | 79474 | 25.31   | <.0001  |
| instvolume   |          | -0.00056 | 0.000258       | 79474 | -2.15   | 0.0314  |
| teachinghosp |          | -0.1211  | 0.08629        | 79474 | -1.40   | 0.1604  |
| hosprevasc   |          | 0.09188  | 0.08229        | 79474 | 1.12    | 0.2642  |
| hospcath     |          | -0.1881  | 0.1484         | 79474 | -1.27   | 0.2051  |
| interval     | 1        | 0.9015   | 0.08198        | 79474 | 11.00   | <.0001  |
| interval     | 2        | 0.8203   | 0.08369        | 79474 | 9.80    | <.0001  |
| interval     | 3        | 0.6749   | 0.08636        | 79474 | 7.81    | <.0001  |
| interval     | 4        | 0.5003   | 0.08980        | 79474 | 5.57    | <.0001  |
| interval     | 5        | 0        | .              | .     | .       | .       |



**Statistical software output C8: Stata output for discrete time survival model with mixed effects**

| event         | Coef.     | Std. Err. | z      | P> z  | [95% Conf. Interval] |           |
|---------------|-----------|-----------|--------|-------|----------------------|-----------|
| event         |           |           |        |       |                      |           |
| age           | .0610397  | .0022284  | 27.39  | 0.000 | .056672              | .0654073  |
| female        | .0994398  | .0454     | 2.19   | 0.029 | .0104575             | .1884221  |
| arf           | .4601694  | .069451   | 6.63   | 0.000 | .324048              | .5962909  |
| carddys       | .111655   | .0553444  | 2.02   | 0.044 | .0031819             | .2201281  |
| chf           | .2264424  | .0482233  | 4.70   | 0.000 | .1319264             | .3209583  |
| crf           | .2275029  | .0707159  | 3.22   | 0.001 | .0889022             | .3661035  |
| cvd           | .3658533  | .1044315  | 3.50   | 0.000 | .1611713             | .5705352  |
| diabcomp      | .2461317  | .0880711  | 2.79   | 0.005 | .0735156             | .4187478  |
| malig         | .9141063  | .0882629  | 10.36  | 0.000 | .7411141             | 1.087098  |
| pulmoned      | .1518741  | .180534   | 0.84   | 0.400 | -.2019661            | .5057143  |
| shock         | 2.067695  | .0819378  | 25.23  | 0.000 | 1.9071               | 2.228291  |
| instvolume    | -.0006107 | .0002647  | -2.31  | 0.021 | -.0011295            | -.0000919 |
| teachinghosp  | -.1623565 | .0892363  | -1.82  | 0.069 | -.3372564            | .0125434  |
| hosprevasc    | .1234783  | .0846026  | 1.46   | 0.144 | -.0423397            | .2892964  |
| hospcath      | -.1757588 | .1516416  | -1.16  | 0.246 | -.4729709            | .1214533  |
| interval      |           |           |        |       |                      |           |
| 2             | -.0806473 | .0592566  | -1.36  | 0.174 | -.1967881            | .0354935  |
| 3             | -.2257341 | .0631262  | -3.58  | 0.000 | -.3494592            | -.1020091 |
| 4             | -.4001375 | .0678462  | -5.90  | 0.000 | -.5331135            | -.2671615 |
| 5             | -.9085649 | .0823858  | -11.03 | 0.000 | -1.070038            | -.7470917 |
| _cons         | -3.99642  | .0606353  | -65.91 | 0.000 | -4.115263            | -3.877577 |
| var(_cons[~]) |           |           |        |       |                      |           |
| _cons         | .0250974  | .0116899  | 2.15   | 0.032 | .0021857             | .0480091  |

**Statistical software output C9:** R output for Cox model with random coefficients (effect of shock varies across hospitals)

```
Model: Surv(time, event) ~ age + female + arf + carddys + chf + crf +
cvd + diabcomp + malig + pulmoned + shock + instvolume +
teachinghosp + hosprevasc + hospcath + (1 + shock | inst)
```

Fixed coefficients

|              | coef          | exp(coef) | se(coef)     | z     | p       |
|--------------|---------------|-----------|--------------|-------|---------|
| age          | 0.0612600211  | 1.0631753 | 0.0022456404 | 27.28 | 0.0e+00 |
| female       | 0.0922776608  | 1.0966693 | 0.0457531282 | 2.02  | 4.4e-02 |
| arf          | 0.4685477395  | 1.5976723 | 0.0705404406 | 6.64  | 3.1e-11 |
| carddys      | 0.1134615028  | 1.1201488 | 0.0555123428 | 2.04  | 4.1e-02 |
| chf          | 0.2340422878  | 1.2636979 | 0.0484928814 | 4.83  | 1.4e-06 |
| crf          | 0.2541525878  | 1.2893685 | 0.0711947421 | 3.57  | 3.6e-04 |
| cvd          | 0.3778429460  | 1.4591338 | 0.1063291735 | 3.55  | 3.8e-04 |
| diabcomp     | 0.2584206164  | 1.2948834 | 0.0883992221 | 2.92  | 3.5e-03 |
| malig        | 0.9170694972  | 2.5019477 | 0.0886933944 | 10.34 | 0.0e+00 |
| pulmoned     | 0.2237470480  | 1.2507546 | 0.1825727201 | 1.23  | 2.2e-01 |
| shock        | 2.2445625015  | 9.4362863 | 0.1299895355 | 17.27 | 0.0e+00 |
| instvolume   | -0.0006329452 | 0.9993673 | 0.0002600221 | -2.43 | 1.5e-02 |
| teachinghosp | -0.1376928447 | 0.8713663 | 0.0881121540 | -1.56 | 1.2e-01 |
| hosprevasc   | 0.0987517550  | 1.1037923 | 0.0834460160 | 1.18  | 2.4e-01 |
| hospcath     | -0.2186464121 | 0.8036058 | 0.1503188110 | -1.45 | 1.5e-01 |

Random effects

| Group | Variable  | Std Dev    | Variance   | Corr        |
|-------|-----------|------------|------------|-------------|
| inst  | Intercept | 0.18494547 | 0.03420483 | -0.58184337 |
|       | shock     | 0.75917974 | 0.57635387 |             |

**Statistical software output C10: SAS output for discrete time mixed effects model with cross-level interactions (interaction between shock and hospital capacity for invasive cardiac procedures)**

Covariance Parameter Estimates

| Cov Parm  | Subject | Estimate | Standard Error |
|-----------|---------|----------|----------------|
| Intercept | inst    | 0.02462  | 0.01168        |

Solutions for Fixed Effects

| Effect           | interval | Estimate | Standard Error | DF    | t Value | Pr >  t |
|------------------|----------|----------|----------------|-------|---------|---------|
| Intercept        |          | -4.8883  | 0.08359        | 159   | -58.48  | <.0001  |
| age              |          | 0.06121  | 0.002233       | 79472 | 27.42   | <.0001  |
| female           |          | 0.09317  | 0.04541        | 79472 | 2.05    | 0.0402  |
| arf              |          | 0.4579   | 0.06961        | 79472 | 6.58    | <.0001  |
| carddys          |          | 0.1049   | 0.05551        | 79472 | 1.89    | 0.0589  |
| chf              |          | 0.2228   | 0.04829        | 79472 | 4.61    | <.0001  |
| crf              |          | 0.2282   | 0.07094        | 79472 | 3.22    | 0.0013  |
| cvd              |          | 0.3675   | 0.1045         | 79472 | 3.52    | 0.0004  |
| diabcomp         |          | 0.2272   | 0.08869        | 79472 | 2.56    | 0.0104  |
| malig            |          | 0.9117   | 0.08873        | 79472 | 10.28   | <.0001  |
| pulmoned         |          | 0.1658   | 0.1792         | 79472 | 0.93    | 0.3548  |
| shock            |          | 2.0748   | 0.1051         | 79472 | 19.73   | <.0001  |
| instvolume       |          | -0.00057 | 0.000264       | 79472 | -2.18   | 0.0293  |
| teachinghosp     |          | -0.1261  | 0.08805        | 79472 | -1.43   | 0.1522  |
| hosprevasc       |          | 0.08414  | 0.08632        | 79472 | 0.97    | 0.3297  |
| hospcath         |          | -0.1316  | 0.1536         | 79472 | -0.86   | 0.3918  |
| interval         | 1        | 0.8971   | 0.08216        | 79472 | 10.92   | <.0001  |
| interval         | 2        | 0.8172   | 0.08386        | 79472 | 9.74    | <.0001  |
| interval         | 3        | 0.6727   | 0.08653        | 79472 | 7.77    | <.0001  |
| interval         | 4        | 0.4988   | 0.08998        | 79472 | 5.54    | <.0001  |
| interval         | 5        | 0        | .              | .     | .       | .       |
| shock*hosprevasc |          | 0.06069  | 0.1678         | 79472 | 0.36    | 0.7176  |
| shock*hospcath   |          | -0.7934  | 0.5259         | 79472 | -1.51   | 0.1314  |
